# Supplementary material for: Psychiatric Comorbidities and Schizophrenia in Youths With Attention-Deficit/Hyperactivity Disorder
Source: PubMed Central journal article supplement (PMC10690465; doi:10.1001/jamanetworkopen.2023.45793), 2023-11-30
Supplement: jamanetwopen-e2345793-s001.pdf [file jamanetwopen-e2345793-s001.pdf]

## Supplemental Online Content

Jeon SM, Lee DY, Cha S, Kwon J-W. Psychiatric comorbidities and schizophrenia in youths with attention-deficit/hyperactivity disorder. *JAMA Netw Open*. 2023;6(11):e2345793. doi:10.1001/jamanetworkopen.2023.45793

**eTable 1.** ICD-10 Codes of ADHD and ATC Codes for ADHD Medications

**eTable 2.** ICD-10 Codes for Psychiatric Comorbid Disorders

**eTable 3.** ATC Codes for Other Psychotropic Medications

**eFigure 1.** Flow Chart of Study Population Selection

**eTable 4.** Association Between Transitioning to Schizophrenia and Psychiatric Comorbidities in Subgroup Analysis by Age Groups

**eTable 5.** Association Between Transitioning to Schizophrenia and Psychiatric Comorbidities in Subgroup Analysis by the Use of Methylphenidate During Follow-Up Period

**eTable 6.** Association Between Transitioning to Schizophrenia and Psychiatric Comorbidities in Subgroup Analysis of Patients Without Specific Psychiatric Disorder

**eTable 7.** Distribution of Patients by the Presence of Psychiatric Comorbidities After Propensity Score Matching

**eTable 8.** Demographics of ADHD Patients According to the Presence of Psychiatric Comorbidity

**eTable 9.** Association Between Transitioning to Schizophrenia and Psychiatric Comorbidities in the PS Matched Cohort

**eTable 10.** Association Between Transitioning to Schizophrenia and Psychiatric Comorbidities in Subgroup Analysis by Age Groups in the PS Matched Cohort

**eTable 11.** Association Between Transitioning to Schizophrenia and Psychiatric Comorbidities in Subgroup Analysis by the Use of Methylphenidate During Follow-Up Period in the PS Matched Cohort

**eTable 12.** Association Between Transitioning to Schizophrenia and Psychiatric Comorbidities in Subgroup Analysis of Patients Without Specific Psychiatric Disorder in the PS Matched Cohort

**eFigure 2.** Sankey Diagram Illustrating the Incidence of Psychiatric Comorbidities in the Diagnostic Transition From ADHD to Schizophrenia in Patients According to Age Groups

This supplemental material has been provided by the authors to give readers additional information about their work.

**eTable 1. ICD-10 Codes of ADHD and ATC Codes for ADHD Medications**

| <b>Psychiatric disorder</b>                             | <b>ICD-10 code</b> |
|---------------------------------------------------------|--------------------|
| ADHD                                                    | F90                |
| <b>ADHD medications (Stimulants and Non-stimulants)</b> | <b>ATC codes</b>   |
| Methylphenidate<br>Modafinil, Atomoxetine, Clonidine    | N06B               |

ADHD, attention deficit hyperactivity disorder; ICD-10, International Classification of Diseases

**eTable 2. ICD-10 Codes for Psychiatric Comorbid Disorders <sup>a</sup>**

| <b>Psychiatric disorder</b> | <b>ICD-10 code</b> |
|-----------------------------|--------------------|
| Depression                  | F32, F33           |
| Anxiety                     | F40, F41           |
| Intellectual disability     | F70–F79            |
| Non-organic sleep disorder  | F51                |
| Tic disorder                | F95                |
| Bipolar disorder            | F31                |
| Autism spectrum disorder    | F84                |
| Conduct disorder            | F91                |

ADHD, attention deficit hyperactivity disorder; ICD-10, International Classification of Diseases

a. We identified all subcodes within the ICD-10 code that corresponded to the presentation of the disease

**eTable 3. ATC Codes for Other Psychotropic Medications**

| <b>Classification</b>   | <b>ATC code</b> | <b>Agents in the classification</b>                                                                                                                                                                                                                       |
|-------------------------|-----------------|-----------------------------------------------------------------------------------------------------------------------------------------------------------------------------------------------------------------------------------------------------------|
| Antipsychotics          | N05A            |                                                                                                                                                                                                                                                           |
| Typical antipsychotics  |                 | Chlorpromazine, Levomepromazine, Perphenazine, Haloperidol, Molindone, Chlorprothixene, Pimozide                                                                                                                                                          |
| Atypical antipsychotics |                 | Blonanserin, Ziprasidone, Clozapine, Olanzapine, Quetiapine, Sulpiride, Amisulpride, Risperidone, Zotepine, Aripiprazole, Paliperidone                                                                                                                    |
| Antidepressants         | N06A            | Fluoxetine, Citalopram, Paroxetine, Sertraline, Fluvoxamine, Escitalopram, Venlafaxine, Milnacipran, Duloxetine, Desvenlafaxine, Clomipramine, Amitriptyline, Doxepin, Amoxapine, Moclobemide, Trazodone, Mirtazapine, Bupropion, Tianeptine              |
| Anxiolytics             | N05B            | Diazepam, Chlordiazepoxide, Lorazepam, Bromazepam, Clobazam, Alprazolam, Ethyl loflazepate, Etizolam, Clotiazepam, Tofisopam, Hydroxyzine, and Buspirone                                                                                                  |
| Anticholinergic drugs   | N04A            | Trihexyphenidyl, Biperiden, Procyclidine, and Benztropine                                                                                                                                                                                                 |
| Antiepileptic drugs     | N03A            | Phenobarbital, Primidone, Phenytoin, Fosphenytoin, Ethosuximide, Clonazepam, Carbamazepine, Oxcarbazepine, Rufinamide, Valproic acid, Vigabatrin, Lamotrigine, Topiramate, Gabapentin, Levetiracetam, Zonisamide, Pregabalin, Stiripentol, and Lacosamide |
| Lithium                 | N05AN01         | Lithium                                                                                                                                                                                                                                                   |

**eFigure 1. Flow Chart of Study Population Selection**

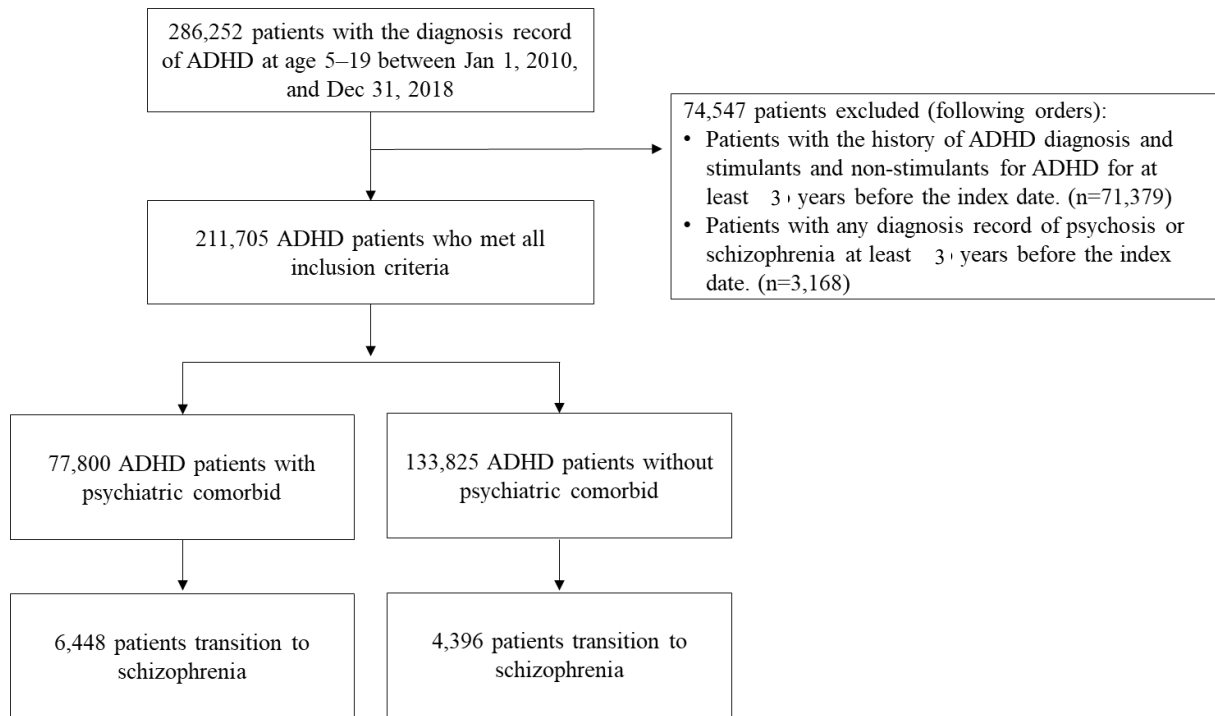

**eTable 4. Association Between Transitioning to Schizophrenia and Psychiatric Comorbidities in Subgroup Analysis by Age Groups**

|                                                                                      | adjusted HR (95% CI) <sup>a</sup> |                   |                  |
|--------------------------------------------------------------------------------------|-----------------------------------|-------------------|------------------|
|                                                                                      | Age 5-9                           | Age 10-14         | Age 15-19        |
| <b>Presence of psychiatric comorbidities (Ref = none)</b>                            | 2.11 (1.99-2.25)                  | 2.15 (2.00-2.31)  | 2.20 (1.99-2.43) |
| <b>Multiple psychiatric comorbidities (Ref = none)</b>                               |                                   |                   |                  |
| One comorbid disorder                                                                | 1.91 (1.79-2.04)                  | 1.89 (1.75-2.04)  | 1.94 (1.74-2.16) |
| Two comorbid disorders                                                               | 3.02 (2.72-3.36)                  | 3.07 (2.77-3.40)  | 2.71 (2.40-3.06) |
| Three or more comorbid disorders                                                     | 4.71 (3.91-5.66)                  | 4.45 (3.83-5.16)  | 3.78 (3.25-4.39) |
| <b>Individual psychiatric comorbidities</b>                                          |                                   |                   |                  |
| Depression (Ref=none)                                                                | 1.76 (1.58-1.96)                  | 1.67 (1.54-1.81)  | 1.59 (1.46-1.73) |
| Anxiety disorder (Ref=none)                                                          | 1.23 (1.11-1.38)                  | 1.28 (1.16-1.41)  | 1.37 (1.25-1.50) |
| Tic disorder (Ref=none)                                                              | 2.02 (1.85-2.20)                  | 1.77 (1.60-1.97)  | 1.39 (1.20-1.62) |
| Intellectual disability (Ref = none)                                                 | 1.65 (1.50-1.82)                  | 2.11 (1.90-2.35)  | 1.87 (1.64-2.14) |
| Conduct disorder (Ref = none)                                                        | 1.34 (1.15-1.56)                  | 1.34 (1.20-1.50)  | 1.02 (0.90-1.16) |
| ASD (Ref = none)                                                                     | 2.64 (2.38-2.93)                  | 2.32 (2.00-2.69)  | 2.27 (1.92-2.69) |
| Bipolar disorder (Ref = none)                                                        | 2.03 (1.67-2.47)                  | 1.72 (1.48-2.01)  | 1.46 (1.28-1.67) |
| OCD (Ref=none)                                                                       | 1.54 (1.17-2.03)                  | 1.59 (1.32-1.91)  | 1.69 (1.46-1.95) |
| Non-organic sleep disorder (Ref = none)                                              | 1.28 (0.88-1.85)                  | 1.91 (1.52-2.40)  | 1.22 (1.05-1.43) |
| SUD (Ref = none)                                                                     | 2.40 (0.34-17.08)                 | 0.90 (0.43-1.89)  | 1.20 (0.85-1.69) |
| <b>Number of comorbidities and individual psychiatric comorbidities (Ref = none)</b> |                                   |                   |                  |
| Depression                                                                           | 1.75 (1.49-2.05)                  | 1.81 (1.62-2.03)  | 2.03 (1.79-2.30) |
| Anxiety disorder                                                                     | 2.05 (1.84-2.27)                  | 2.22 (1.93-2.55)  | 1.57 (1.30-1.89) |
| Tic disorder                                                                         | 1.07 (0.89-1.28)                  | 1.28 (1.07-1.54)  | 1.98 (1.45-2.69) |
| Intellectual disability                                                              | 1.95 (1.73-2.20)                  | 2.71 (2.35-3.13)  | 2.83 (2.28-3.52) |
| Conduct disorder                                                                     | 1.44 (1.16-1.78)                  | 1.34 (1.11-1.61)  | 1.42 (1.13-1.79) |
| ASD                                                                                  | 3.44 (3.02-3.92)                  | 3.34 (2.64-4.23)  | 4.31 (3.16-5.88) |
| Bipolar disorder                                                                     | 1.84 (1.11-3.06)                  | 1.32 (0.85-2.06)  | 2.15 (1.48-3.12) |
| OCD                                                                                  | 3.85 (2.45-6.04)                  | 2.16 (1.35-3.44)  | 1.70 (1.18-2.43) |
| Non-organic sleep disorder                                                           | 1.37 (0.81-2.32)                  | 1.07 (0.51-2.26)  | 0.68 (0.32-1.44) |
| SUD                                                                                  | -                                 | 2.51 (0.63-10.06) | 1.26 (0.31-5.03) |
| Two comorbid disorders                                                               | 4.89 (4.07-5.87)                  | 4.48 (3.85-5.20)  | 3.82 (3.29-4.44) |
| Three or more comorbid disorders                                                     | 3.09 (2.78-3.43)                  | 3.08 (2.78-3.41)  | 2.72 (2.41-3.07) |

Attention deficit hyperactivity disorder, ADHD; hazard ratios, HRs; confidence intervals, CIs; autism spectrum disorder, ASD; obsessive-compulsive disorder, OCD; substance use disorder, SUD

a. The result was estimated using Model 2, adjusting sex, age, health insurance, psychiatric hospitalization, and psychotropic medication use as covariates.

**eTable 5. Association Between Transitioning to Schizophrenia and Psychiatric Comorbidities in Subgroup Analysis by the Use of Methylphenidate During Follow-Up Period <sup>a</sup>**

|                                                                                      | adjusted HRs (95% CI) <sup>a</sup>                                    |                                                                             |
|--------------------------------------------------------------------------------------|-----------------------------------------------------------------------|-----------------------------------------------------------------------------|
|                                                                                      | Patients who used methylphenidate during follow-up period (n=142,493) | Patients who did not use methylphenidate during follow-up period (n=69,212) |
| <b>Presence of psychiatric comorbidities (Ref = none)</b>                            | 2.02 (1.92-2.12)                                                      | 2.64 (2.43-2.87)                                                            |
| <b>Multiple psychiatric comorbidities (Ref = none)</b>                               |                                                                       |                                                                             |
| One comorbid disorder                                                                | 1.83 (1.74-1.93)                                                      | 2.30 (2.11-2.52)                                                            |
| Two comorbid disorders                                                               | 2.75 (2.55-2.96)                                                      | 3.68 (3.29-4.11)                                                            |
| Three or more comorbid disorders                                                     | 3.89 (3.48-4.34)                                                      | 5.40 (4.65-6.27)                                                            |
| <b>Individual psychiatric comorbidities</b>                                          |                                                                       |                                                                             |
| Depression (Ref=none)                                                                | 1.65 (1.55-1.76)                                                      | 1.69 (1.54-1.86)                                                            |
| Anxiety disorder (Ref=none)                                                          | 1.32 (1.23-1.41)                                                      | 1.34 (1.22-1.47)                                                            |
| Tic disorder (Ref=none)                                                              | 1.73 (1.59-1.89)                                                      | 2.20 (2.00-2.41)                                                            |
| Intellectual disability (Ref = none)                                                 | 1.80 (1.68-1.93)                                                      | 1.75 (1.53-1.99)                                                            |
| Conduct disorder (Ref = none)                                                        | 1.19 (1.09-1.30)                                                      | 1.22 (1.06-1.40)                                                            |
| ASD (Ref = none)                                                                     | 2.37 (2.18-2.59)                                                      | 2.41 (2.08-2.80)                                                            |
| Bipolar disorder (Ref = none)                                                        | 1.59 (1.43-1.78)                                                      | 1.79 (1.54-2.07)                                                            |
| OCD (Ref=none)                                                                       | 1.43 (1.25-1.64)                                                      | 1.95 (1.66-2.29)                                                            |
| Non-organic sleep disorder (Ref = none)                                              | 1.44 (1.25-1.67)                                                      | 1.40 (1.13-1.75)                                                            |
| SUD (Ref = none)                                                                     | 1.10 (0.75-1.62)                                                      | 1.18 (0.71-1.98)                                                            |
| <b>Number of comorbidities and individual psychiatric comorbidities (Ref = none)</b> |                                                                       |                                                                             |
| Depression                                                                           | 1.77 (1.63-1.92)                                                      | 2.30 (2.00-2.65)                                                            |
| Anxiety disorder                                                                     | 1.27 (1.12-1.44)                                                      | 1.43 (1.18-1.73)                                                            |
| Tic disorder                                                                         | 2.06 (1.84-2.30)                                                      | 2.78 (2.45-3.14)                                                            |
| Intellectual disability                                                              | 2.14 (1.95-2.35)                                                      | 2.54 (2.11-3.06)                                                            |
| Conduct disorder                                                                     | 1.33 (1.16-1.52)                                                      | 1.40 (1.08-1.80)                                                            |
| ASD                                                                                  | 3.24 (2.88-3.65)                                                      | 3.95 (3.13-4.98)                                                            |
| Bipolar disorder                                                                     | 1.92 (1.40-2.64)                                                      | 4.01 (2.74-5.87)                                                            |
| OCD                                                                                  | 1.44 (1.08-1.92)                                                      | 2.03 (1.29-3.21)                                                            |
| Non-organic sleep disorder                                                           | 1.04 (0.67-1.61)                                                      | 1.22 (0.61-2.44)                                                            |
| SUD                                                                                  | 2.37 (0.89-6.32)                                                      | -                                                                           |
| Two comorbid disorders                                                               | 2.72 (2.53-2.93)                                                      | 5.44 (4.69-6.32)                                                            |
| Three or more comorbid disorders                                                     | 3.87 (3.47-4.33)                                                      | 3.67 (3.28-4.10)                                                            |

Attention deficit hyperactivity disorder, ADHD; hazard ratios, HRs; confidence intervals, CIs; autism spectrum disorder, ASD; obsessive-compulsive disorder, OCD; substance use disorder, SUD

a. The result was estimated using Model 2, adjusting sex, age, health insurance, psychiatric hospitalization, and psychotropic medication use as covariates.

**eTable 6. Association Between Transitioning to Schizophrenia and Psychiatric Comorbidities in Subgroup Analysis of Patients Without Specific Psychiatric Disorder <sup>a</sup>**

|                                                                                      | adjusted HRs (95% CI) <sup>a</sup>            |                                  |                                 |                                                            |
|--------------------------------------------------------------------------------------|-----------------------------------------------|----------------------------------|---------------------------------|------------------------------------------------------------|
|                                                                                      | Patients without bipolar disorder (n=207,347) | Patients without ASD (n=204,838) | Patients without ID (n=199,265) | Patients without bipolar disorder, ASD, and ID (n=190,251) |
| <b>Presence of psychiatric comorbidities (Ref = none)</b>                            | 2.07 (1.98-2.16)                              | 2.00 (1.91-2.09)                 | 2.05 (1.96-2.15)                | 1.84 (1.76-1.93)                                           |
| <b>Multiple psychiatric comorbidities (Ref = none)</b>                               |                                               |                                  |                                 |                                                            |
| One comorbid disorder                                                                | 1.89 (1.81-1.98)                              | 1.81 (1.73-1.89)                 | 1.85 (1.77-1.94)                | 1.69 (1.78-1.61)                                           |
| Two comorbid disorders                                                               | 2.77 (2.60-2.95)                              | 2.78 (2.61-2.97)                 | 2.91 (2.72-3.11)                | 2.53 (2.73-2.35)                                           |
| Three or more comorbid disorders                                                     | 4.04 (3.64-4.49)                              | 3.96 (3.59-4.36)                 | 4.06 (3.67-4.49)                | 3.69 (4.21-3.23)                                           |
| <b>Individual psychiatric comorbidities</b>                                          |                                               |                                  |                                 |                                                            |
| Depression (Ref=none)                                                                | 1.72 (1.63-1.82)                              | 1.72 (1.63-1.81)                 | 1.74 (1.65-1.84)                | 1.81 (1.71-1.92)                                           |
| Anxiety disorder (Ref=none)                                                          | 1.32 (1.25-1.40)                              | 1.32 (1.25-1.40)                 | 1.33 (1.25-1.41)                | 1.33 (1.24-1.41)                                           |
| Tic disorder (Ref=none)                                                              | 1.75 (1.64-1.87)                              | 1.83 (1.72-1.95)                 | 1.83 (1.72-1.95)                | 1.87 (1.75-2.01)                                           |
| Intellectual disability (Ref = none)                                                 | 1.85 (1.73-1.97)                              | 2.02 (1.89-2.16)                 |                                 |                                                            |
| Conduct disorder (Ref = none)                                                        | 1.23 (1.14-1.33)                              | 1.22 (1.13-1.32)                 | 1.25 (1.15-1.35)                | 1.28 (1.18-1.39)                                           |
| ASD (Ref = none)                                                                     | 2.48 (2.29-2.68)                              |                                  | 2.84 (2.61-3.09)                |                                                            |
| Bipolar disorder (Ref = none)                                                        | -                                             | 1.72 (1.57-1.89)                 | 1.73 (1.57-1.90)                |                                                            |
| OCD (Ref=none)                                                                       | 1.69 (1.51-1.89)                              | 1.69 (1.51-1.88)                 | 1.68 (1.51-1.87)                | 1.80 (1.60-2.02)                                           |
| Non-organic sleep disorder (Ref = none)                                              | 1.50 (1.31-1.72)                              | 1.44 (1.27-1.63)                 | 1.43 (1.26-1.62)                | 1.51 (1.31-1.75)                                           |
| SUD (Ref = none)                                                                     | 1.20 (0.83-1.75)                              | 1.10 (0.80-1.50)                 | 1.13 (0.82-1.54)                | 1.19 (0.81-1.74)                                           |
| <b>Number of comorbidities and individual psychiatric comorbidities (Ref = none)</b> |                                               |                                  |                                 |                                                            |
| Depression                                                                           | 1.87 (1.74-2.00)                              | 1.88 (1.75-2.01)                 | 1.91 (1.78-2.04)                | 1.86 (1.73-1.99)                                           |
| Anxiety disorder                                                                     | 1.27 (1.15-1.41)                              | 1.28 (1.15-1.42)                 | 1.28 (1.16-1.42)                | 1.27 (1.14-1.41)                                           |
| Tic disorder                                                                         | 2.03 (1.88-2.21)                              | 2.06 (1.90-2.23)                 | 2.05 (1.90-2.23)                | 2.06 (1.90-2.24)                                           |
| Intellectual disability                                                              | 2.28 (2.10-2.48)                              | 2.29 (2.11-2.49)                 |                                 |                                                            |
| Conduct disorder                                                                     | 1.36 (1.21-1.53)                              | 1.37 (1.22-1.54)                 | 1.38 (1.23-1.55)                | 1.38 (1.22-1.55)                                           |
| ASD                                                                                  | 3.44 (3.09-3.82)                              |                                  | 3.46 (3.11-3.84)                |                                                            |
| Bipolar disorder                                                                     |                                               | 2.45 (1.92-3.13)                 | 2.51 (1.96-3.20)                |                                                            |
| OCD                                                                                  | 1.54 (1.21-1.97)                              | 1.55 (1.21-1.97)                 | 1.58 (1.24-2.01)                | 1.53 (1.20-1.96)                                           |
| Non-organic sleep disorder                                                           | 1.03 (0.71-1.49)                              | 1.03 (0.71-1.50)                 | 1.04 (0.72-1.50)                | 1.03 (0.71-1.49)                                           |
| SUD                                                                                  | 1.51 (0.57-4.02)                              | 1.51 (0.57-4.04)                 | 1.54 (0.58-4.10)                | 1.53 (0.57-4.08)                                           |
| Two comorbid disorders                                                               | 2.74 (2.57-2.93)                              | 3.97 (3.60-4.38)                 | 4.11 (3.72-4.55)                | 2.56 (2.37-2.76)                                           |
| Three or more comorbid disorders                                                     | 4.01 (3.61-4.45)                              | 2.78 (2.60-2.96)                 | 2.90 (2.72-3.11)                | 3.76 (3.30-4.29)                                           |

Attention deficit hyperactivity disorder, ADHD; hazard ratios, HRs; confidence intervals, CIs; autism spectrum disorder, ASD; intellectual disability, ID; obsessive-compulsive disorder, OCD; substance use disorder, SUD  
a. The result was estimated using Model 2, adjusting sex, age, health insurance, psychiatric hospitalization, and psychotropic medication use as covariates.



**eTable 7. Distribution of Patients by the Presence of Psychiatric Comorbidities After Propensity Score Matching**

|                                    | Non matched cohort                           |                                                  | aSD   | Propensity score-matched cohort              |                                                 |       |
|------------------------------------|----------------------------------------------|--------------------------------------------------|-------|----------------------------------------------|-------------------------------------------------|-------|
|                                    | ADHD with psychiatric comorbidity (n=77,880) | ADHD without psychiatric comorbidity (n=133,825) |       | ADHD with psychiatric comorbidity (n=70,590) | ADHD without psychiatric comorbidity (n=70,590) | aSD   |
| Sex_Female                         | 23968 (30.8)                                 | 30465 (22.8)                                     | 0.182 | 20274 (28.7)                                 | 19666 (27.9)                                    | 0.019 |
| Age (years)                        |                                              |                                                  | 0.525 |                                              |                                                 | 0.046 |
| 5-9                                | 31647 (40.6)                                 | 83434 (62.3)                                     |       | 31442 (44.5)                                 | 32041 (45.4)                                    |       |
| 10-14                              | 26309 (33.8)                                 | 38282 (28.6)                                     |       | 25780 (36.5)                                 | 26440 (37.5)                                    |       |
| 15-19                              | 19924 (25.6)                                 | 12109 (9.0)                                      |       | 13368 (18.9)                                 | 12109 (17.2)                                    |       |
| Health insurance_Medicaid          | 6244 (8.0)                                   | 8777 (6.6)                                       | 0.056 | 5069 (7.2)                                   | 4773 (6.8)                                      | 0.016 |
| Healthcare utilization (Mean (SD)) |                                              |                                                  |       |                                              |                                                 |       |
| Overall utilization                | 18.87 (16.71)                                | 17.04 (14.02)                                    | 0.119 | 18.28 (15.03)                                | 18.21 (16.01)                                   | 0.005 |
| Overall psychiatrist visits        | 0.06 (0.24)                                  | 0.05 (0.22)                                      | 0.056 | 0.06 (0.23)                                  | 0.05 (0.22)                                     | 0.018 |
| Overall physicians visits          | 18.68 (16.66)                                | 16.98 (14.01)                                    | 0.111 | 18.18 (15.04)                                | 18.12 (16.00)                                   | 0.004 |
| Inpatients psychiatric visits      | 243 (0.3)                                    | 20 (0.0)                                         | 0.074 | 130 (0.2)                                    | 12 (0.0)                                        | 0.05  |

Attention deficit hyperactivity disorder, ADHD; absolute standardized difference, Asd

**eTable 8. Demographics of ADHD Patients According to the Presence of Psychiatric Comorbidity**

|                                                       | Total patients<br>(n=141,180) | ADHD with<br>psychiatric<br>comorbidity<br>(n=79,626) | ADHD without<br>psychiatric<br>comorbidity<br>(n=79,626) | p-<br>value |
|-------------------------------------------------------|-------------------------------|-------------------------------------------------------|----------------------------------------------------------|-------------|
| Transition to schizophrenia                           | 8013 (5.68)                   | 5549 (7.86)                                           | 2464 (3.49)                                              | <.0001      |
| Follow-up (years) (Median)                            | 6.29                          | 5.64                                                  | 6.75                                                     | <.0001      |
| Sex                                                   |                               |                                                       |                                                          |             |
| Male                                                  | 101240 (71.71)                | 50316 (71.28)                                         | 50924 (72.14)                                            | 0.0003      |
| Female                                                | 39940 (28.29)                 | 20274 (28.72)                                         | 19666 (27.86)                                            |             |
| Age (years)                                           |                               |                                                       |                                                          |             |
| 5–9                                                   | 63483 (44.97)                 | 31442 (44.54)                                         | 32041 (45.39)                                            | <.0001      |
| 10–14                                                 | 52220 (36.99)                 | 25780 (36.52)                                         | 26440 (37.46)                                            |             |
| 15–19                                                 | 25477 (18.05)                 | 13368 (18.94)                                         | 12109 (17.15)                                            |             |
| Health insurance                                      |                               |                                                       |                                                          |             |
| Health insurance                                      | 131338 (93.03)                | 65521 (92.82)                                         | 65817 (93.24)                                            | 0.002       |
| Medicaid                                              | 9842 (6.97)                   | 5069 (7.18)                                           | 4773 (6.76)                                              |             |
| Psychiatric hospitalization <sup>a</sup>              | 130 (0.09)                    | 118 (0.17)                                            | 12 (0.02)                                                | <.0001      |
| Psychiatric comorbidities <sup>a</sup>                |                               |                                                       |                                                          |             |
| The number of psychiatric comorbidities               |                               |                                                       |                                                          |             |
| One comorbidity                                       | 52453 (37.15)                 | 52453 (74.31)                                         | -                                                        |             |
| Two comorbidities                                     | 14423 (10.22)                 | 14423 (20.43)                                         | -                                                        |             |
| Three or more comorbidities                           | 3714 (2.63)                   | 3714 (5.26)                                           | -                                                        |             |
| Individual psychiatric comorbid disorder <sup>b</sup> |                               |                                                       |                                                          |             |
| Depression                                            | 25441 (18.02)                 | 25441 (36.04)                                         | -                                                        |             |
| Anxiety                                               | 16996 (12.04)                 | 16996 (24.08)                                         | -                                                        |             |
| Tic disorder                                          | 14926 (10.57)                 | 14926 (21.14)                                         | -                                                        |             |
| Intellectual disability                               | 11706 (8.29)                  | 11706 (16.58)                                         | -                                                        |             |
| Conduct disorder                                      | 9449 (6.69)                   | 9449 (13.39)                                          | -                                                        |             |
| ASD                                                   | 6563 (4.65)                   | 6563 (9.30)                                           | -                                                        |             |
| Bipolar disorder                                      | 3462 (2.45)                   | 3462 (4.90)                                           | -                                                        |             |
| Obsessive-Compulsive Disorder                         | 2574 (1.82)                   | 2574 (3.65)                                           | -                                                        |             |
| Non-organic sleep disorder                            | 1911 (1.35)                   | 1911 (2.71)                                           | -                                                        |             |
| Substance Use Disorder                                | 220 (0.16)                    | 220 (0.31)                                            | -                                                        |             |
| Use of psychotropic medications <sup>a</sup>          |                               |                                                       |                                                          |             |
| Typical antipsychotics                                | 1303 (0.92)                   | 1256 (1.78)                                           | 47 (0.07)                                                | <.0001      |
| Atypical antipsychotics                               | 7133 (5.05)                   | 6909 (9.79)                                           | 224 (0.32)                                               | <.0001      |
| Anticholinergics                                      | 1915 (1.36)                   | 1865 (2.64)                                           | 50 (0.07)                                                | <.0001      |
| Anxiolytics                                           | 30067 (21.30)                 | 16635 (23.57)                                         | 13432 (19.03)                                            | <.0001      |
| SSRIs/SNRIs                                           | 11597 (8.21)                  | 10311 (14.61)                                         | 1286 (1.82)                                              | <.0001      |
| TCAs                                                  | 666 (0.47)                    | 532 (0.75)                                            | 134 (0.19)                                               | <.0001      |
| MAOIs and others                                      | 1499 (1.06)                   | 1320 (1.87)                                           | 179 (0.25)                                               | <.0001      |
| Antiepileptics                                        | 4913 (3.48)                   | 3421 (4.85)                                           | 1492 (2.11)                                              | <.0001      |
| Lithium                                               | 422 (0.30)                    | 386 (0.55)                                            | 36 (0.05)                                                | <.0001      |

Attention deficit hyperactivity disorder, ADHD; autism spectrum disorder, ASD; selective serotonin reuptake inhibitors, SSRIs; serotonin and norepinephrine reuptake inhibitors, SNRIs; Tricyclic antidepressants, TCA; monoamine oxidase inhibitors, MAOIs

a. History of psychiatric hospitalization, psychiatric comorbidities, and the use of psychotropic medications were valued within one-year before the index date.

b. Patient with at least one diagnosis record of each disorder was considered to have each disorder.

**eTable 9. Association Between Transitioning to Schizophrenia and Psychiatric Comorbidities in the PS Matched Cohort**

|                                                                                      | <b>adjusted HR (95% CI) <sup>a</sup></b> |
|--------------------------------------------------------------------------------------|------------------------------------------|
| <b>Presence of psychiatric comorbidities</b>                                         | 2.10 (2.00-2.21)                         |
| <b>Multiple psychiatric comorbidities (Ref = none)</b>                               |                                          |
| One comorbid disorder                                                                | 1.86 (1.76-1.96)                         |
| Two comorbid disorders                                                               | 2.93 (2.73-3.13)                         |
| Three or more comorbid disorders                                                     | 4.36 (3.95-4.81)                         |
| <b>Individual psychiatric comorbidities</b>                                          |                                          |
| Depression (Ref=none)                                                                | 1.67 (1.58-1.76)                         |
| Anxiety disorder (Ref=none)                                                          | 1.28 (1.20-1.36)                         |
| Tic disorder (Ref=none)                                                              | 1.80 (1.69-1.92)                         |
| Intellectual disability (Ref = none)                                                 | 1.82 (1.70-1.94)                         |
| Conduct disorder (Ref = none)                                                        | 1.23 (1.14-1.34)                         |
| ASD (Ref = none)                                                                     | 2.40 (2.22-2.60)                         |
| Bipolar disorder (Ref = none)                                                        | 1.81 (1.64-1.99)                         |
| OCD (Ref=none)                                                                       | 1.69 (1.51-1.90)                         |
| Non-organic sleep disorder (Ref = none)                                              | 1.48 (1.29-1.71)                         |
| SUD (Ref = none)                                                                     | 1.24 (0.85-1.80)                         |
| <b>Number of comorbidities and individual psychiatric comorbidities (Ref = none)</b> |                                          |
| Depression                                                                           | 1.83 (1.69-1.98)                         |
| Anxiety disorder                                                                     | 1.19 (1.06-1.34)                         |
| Tic disorder                                                                         | 2.03 (1.86-2.22)                         |
| Intellectual disability                                                              | 2.27 (2.08-2.49)                         |
| Conduct disorder                                                                     | 1.36 (1.20-1.54)                         |
| ASD                                                                                  | 3.38 (3.02-3.79)                         |
| Bipolar disorder                                                                     | 2.30 (1.73-3.04)                         |
| OCD                                                                                  | 1.58 (1.21-2.05)                         |
| Non-organic sleep disorder                                                           | 1.12 (0.77-1.64)                         |
| SUD                                                                                  | 1.87 (0.70-4.98)                         |
| Two comorbid disorders                                                               | 2.93 (2.74-3.14)                         |
| Three or more comorbid disorders                                                     | 4.40 (3.98-4.85)                         |

Attention deficit hyperactivity disorder, ADHD; hazard ratios, HRs; confidence intervals, CIs; autism spectrum disorder, ASD; obsessive-compulsive disorder, OCD; substance use disorder, SUD

a. The result was estimated using Model 2, adjusting sex, age, health insurance, psychiatric hospitalization, and psychotropic medication use as covariates.

**eTable 10. Association Between Transitioning to Schizophrenia and Psychiatric Comorbidities in Subgroup Analysis by Age Groups in the PS Matched Cohort**

|                                                                                      | adjusted HR (95% CI) <sup>a</sup> |                   |                  |
|--------------------------------------------------------------------------------------|-----------------------------------|-------------------|------------------|
|                                                                                      | Age 5-9                           | Age 10-14         | Age 15-19        |
| <b>Presence of psychiatric comorbidities</b>                                         | 2.05 (1.90-2.22)                  | 2.11 (1.95-2.29)  | 2.17 (1.95-2.41) |
| <b>Multiple psychiatric comorbidities (Ref = none)</b>                               |                                   |                   |                  |
| One comorbid disorder                                                                | 1.86 (1.72-2.02)                  | 1.84 (1.69-2.01)  | 1.88 (1.68-2.11) |
| Two comorbid disorders                                                               | 2.94 (2.61-3.30)                  | 3.04 (2.73-3.39)  | 2.72 (2.37-3.12) |
| Three or more comorbid disorders                                                     | 4.53 (3.73-5.50)                  | 4.58 (3.92-5.36)  | 3.91 (3.28-4.67) |
| <b>Individual psychiatric comorbidities</b>                                          |                                   |                   |                  |
| Depression (Ref=none)                                                                | 1.72 (1.54-1.92)                  | 1.64 (1.51-1.79)  | 1.64 (1.48-1.81) |
| Anxiety disorder (Ref=none)                                                          | 1.19 (1.07-1.33)                  | 1.25 (1.13-1.38)  | 1.37 (1.22-1.54) |
| Tic disorder (Ref=none)                                                              | 1.94 (1.77-2.13)                  | 1.77 (1.59-1.97)  | 1.62 (1.35-1.94) |
| Intellectual disability (Ref = none)                                                 | 1.60 (1.45-1.77)                  | 2.10 (1.88-2.34)  | 1.95 (1.65-2.31) |
| Conduct disorder (Ref = none)                                                        | 1.30 (1.12-1.52)                  | 1.36 (1.21-1.52)  | 1.03 (0.88-1.21) |
| ASD (Ref = none)                                                                     | 2.55 (2.29-2.84)                  | 2.36 (2.03-2.75)  | 2.24 (1.81-2.78) |
| Bipolar disorder (Ref = none)                                                        | 2.06 (1.69-2.51)                  | 1.81 (1.55-2.12)  | 1.61 (1.36-1.91) |
| OCD (Ref=none)                                                                       | 1.57 (1.20-2.07)                  | 1.59 (1.32-1.91)  | 1.84 (1.54-2.20) |
| Non-organic sleep disorder (Ref = none)                                              | 1.23 (0.84-1.81)                  | 2.02 (1.59-2.55)  | 1.24 (1.02-1.52) |
| SUD (Ref = none)                                                                     | 2.35 (0.33-16.70)                 | 1.05 (0.50-2.21)  | 1.32 (0.84-2.07) |
| <b>Number of comorbidities and individual psychiatric comorbidities (Ref = none)</b> |                                   |                   |                  |
| Depression                                                                           | 1.72 (1.45-2.02)                  | 1.76 (1.57-1.98)  | 1.99 (1.73-2.28) |
| Anxiety disorder                                                                     | 1.04 (0.86-1.25)                  | 1.24 (1.03-1.50)  | 1.37 (1.08-1.72) |
| Tic disorder                                                                         | 1.99 (1.77-2.23)                  | 2.19 (1.89-2.53)  | 1.97 (1.38-2.82) |
| Intellectual disability                                                              | 1.91 (1.68-2.17)                  | 2.65 (2.28-3.07)  | 3.05 (2.38-3.91) |
| Conduct disorder                                                                     | 1.41 (1.13-1.75)                  | 1.31 (1.09-1.59)  | 1.43 (1.09-1.86) |
| ASD                                                                                  | 3.32 (2.89-3.81)                  | 3.40 (2.68-4.32)  | 3.78 (2.58-5.54) |
| Bipolar disorder                                                                     | 3.73 (2.37-5.87)                  | 2.01 (1.22-3.30)  | 1.75 (1.04-2.93) |
| OCD                                                                                  | 1.81 (1.08-3.01)                  | 1.36 (0.87-2.11)  | 1.73 (1.12-2.65) |
| Non-organic sleep disorder                                                           | 1.35 (0.80-2.30)                  | 1.08 (0.51-2.27)  | 0.82 (0.37-1.83) |
| SUD                                                                                  | -                                 | 2.50 (0.63-10.03) | 1.75 (0.44-7.03) |
| Two comorbid disorders                                                               | 3.00 (2.67-3.37)                  | 3.04 (2.73-3.40)  | 2.72 (2.37-3.11) |
| Three or more comorbid disorders                                                     | 4.70 (3.87-5.70)                  | 4.63 (3.96-5.41)  | 3.92 (3.28-4.68) |

Attention deficit hyperactivity disorder, ADHD; hazard ratios, HRs; confidence intervals, CIs; autism spectrum disorder, ASD; obsessive-compulsive disorder, OCD; substance use disorder, SUD

a. The result was estimated using Model 2, adjusting sex, age, health insurance, psychiatric hospitalization, and psychotropic medication use as covariates.

**eTable 11. Association Between Transitioning to Schizophrenia and Psychiatric Comorbidities in Subgroup Analysis by the Use of Methylphenidate During Follow-Up Period in the PS Matched Cohort <sup>a</sup>**

|                                                                                      | adjusted HRs (95% CI) <sup>a</sup>                                   |                                                                             |
|--------------------------------------------------------------------------------------|----------------------------------------------------------------------|-----------------------------------------------------------------------------|
|                                                                                      | Patients who used methylphenidate during follow-up period (n=93,929) | Patients who did not use methylphenidate during follow-up period (n=47,251) |
| <b>Presence of psychiatric comorbidities</b>                                         | 2.00 (1.89-2.12)                                                     | 2.49 (2.26-2.74)                                                            |
| <b>Multiple psychiatric comorbidities (Ref = none)</b>                               |                                                                      |                                                                             |
| One comorbid disorder                                                                | 1.80 (1.69-1.91)                                                     | 2.12 (1.91-2.35)                                                            |
| Two comorbid disorders                                                               | 2.74 (2.53-2.98)                                                     | 3.54 (3.13-4.01)                                                            |
| Three or more comorbid disorders                                                     | 4.02 (3.54-4.55)                                                     | 5.35 (4.53-6.32)                                                            |
| <b>Individual psychiatric comorbidities</b>                                          |                                                                      |                                                                             |
| Depression (Ref=none)                                                                | 1.65 (1.54-1.76)                                                     | 1.65 (1.49-1.82)                                                            |
| Anxiety disorder (Ref=none)                                                          | 1.28 (1.19-1.38)                                                     | 1.31 (1.18-1.45)                                                            |
| Tic disorder (Ref=none)                                                              | 1.77 (1.61-1.93)                                                     | 2.23 (2.01-2.46)                                                            |
| Intellectual disability (Ref = none)                                                 | 1.78 (1.64-1.92)                                                     | 1.73 (1.50-2.00)                                                            |
| Conduct disorder (Ref = none)                                                        | 1.21 (1.11-1.33)                                                     | 1.24 (1.06-1.45)                                                            |
| ASD (Ref = none)                                                                     | 2.36 (2.15-2.59)                                                     | 2.34 (2.00-2.75)                                                            |
| Bipolar disorder (Ref = none)                                                        | 1.68 (1.48-1.90)                                                     | 2.05 (1.74-2.40)                                                            |
| OCD (Ref=none)                                                                       | 1.50 (1.29-1.75)                                                     | 2.00 (1.67-2.39)                                                            |
| Non-organic sleep disorder (Ref = none)                                              | 1.61 (1.36-1.90)                                                     | 1.37 (1.05-1.78)                                                            |
| SUD (Ref = none)                                                                     | 1.29 (0.82-2.04)                                                     | 1.25 (0.65-2.42)                                                            |
| <b>Number of comorbidities and individual psychiatric comorbidities (Ref = none)</b> |                                                                      |                                                                             |
| Depression                                                                           | 1.73 (1.58-1.89)                                                     | 2.06 (1.76-2.41)                                                            |
| Anxiety disorder                                                                     | 1.17 (1.02-1.34)                                                     | 2.62 (2.29-3.01)                                                            |
| Tic disorder                                                                         | 2.07 (1.84-2.33)                                                     | 1.31 (1.06-1.62)                                                            |
| Intellectual disability                                                              | 2.13 (1.93-2.36)                                                     | 2.39 (1.95-2.93)                                                            |
| Conduct disorder                                                                     | 1.32 (1.14-1.52)                                                     | 1.33 (1.01-1.76)                                                            |
| ASD                                                                                  | 3.23 (2.84-3.66)                                                     | 3.55 (2.76-4.57)                                                            |
| Bipolar disorder                                                                     | 1.76 (1.21-2.54)                                                     | 1.73 (1.02-2.94)                                                            |
| OCD                                                                                  | 1.53 (1.13-2.08)                                                     | 3.90 (2.51-6.05)                                                            |
| Non-organic sleep disorder                                                           | 1.17 (0.75-1.82)                                                     | 1.17 (0.55-2.46)                                                            |
| SUD                                                                                  | 2.81 (1.05-7.49)                                                     | -                                                                           |
| Two comorbid disorders                                                               | 2.75 (2.53-2.99)                                                     | 3.58 (3.16-4.05)                                                            |
| Three or more comorbid disorders                                                     | 4.06 (3.58-4.60)                                                     | 5.47 (4.63-6.46)                                                            |

Attention deficit hyperactivity disorder, ADHD; hazard ratios, HRs; confidence intervals, CIs; autism spectrum disorder, ASD; obsessive-compulsive disorder, OCD; substance use disorder, SUD

a. The result was estimated using Model 2, adjusting sex, age, health insurance, psychiatric hospitalization, and psychotropic medication use as covariates.

**eTable 12. Association Between Transitioning to Schizophrenia and Psychiatric Comorbidities in Subgroup Analysis of Patients Without Specific Psychiatric Disorder in the PS Matched Cohort <sup>a</sup>**

|                                                                                      | adjusted HRs (95% CI) <sup>a</sup>            |                                  |                                 |                                                            |
|--------------------------------------------------------------------------------------|-----------------------------------------------|----------------------------------|---------------------------------|------------------------------------------------------------|
|                                                                                      | Patients without bipolar disorder (n=137,718) | Patients without ASD (n=134,617) | Patients without ID (n=129,474) | Patients without bipolar disorder, ASD, and ID (n=190,251) |
| <b>Presence of psychiatric comorbidities</b>                                         | 2.04 (1.94-2.14)                              | 1.98 (1.88-2.08)                 | 2.02 (1.91-2.12)                | 1.82 (1.72-1.92)                                           |
| <b>Multiple psychiatric comorbidities (Ref = none)</b>                               |                                               |                                  |                                 |                                                            |
| One comorbid disorder                                                                | 1.85 (1.75-1.95)                              | 1.76 (1.67-1.86)                 | 1.79 (1.70-1.89)                | 1.65 (1.75-1.56)                                           |
| Two comorbid disorders                                                               | 2.75 (2.56-2.95)                              | 2.79 (2.60-3.00)                 | 2.93 (2.72-3.15)                | 2.57 (2.80-2.37)                                           |
| Three or more comorbid disorders                                                     | 4.13 (3.67-4.64)                              | 4.04 (3.63-4.51)                 | 4.15 (3.71-4.65)                | 3.72 (4.32-3.20)                                           |
| <b>Individual psychiatric comorbidities</b>                                          |                                               |                                  |                                 |                                                            |
| Depression (Ref=none)                                                                | 1.69 (1.60-1.79)                              | 1.70 (1.60-1.80)                 | 1.74 (1.64-1.84)                | 1.80 (1.69-1.91)                                           |
| Anxiety disorder (Ref=none)                                                          | 1.28 (1.19-1.36)                              | 1.28 (1.20-1.37)                 | 1.28 (1.20-1.37)                | 1.28 (1.19-1.37)                                           |
| Tic disorder (Ref=none)                                                              | 1.79 (1.67-1.91)                              | 1.87 (1.74-2.00)                 | 1.87 (1.75-2.00)                | 1.92 (1.78-2.07)                                           |
| Intellectual disability (Ref = none)                                                 | 1.83 (1.71-1.96)                              | 2.01 (1.87-2.16)                 |                                 |                                                            |
| Conduct disorder (Ref = none)                                                        | 1.26 (1.16-1.38)                              | 1.25 (1.15-1.36)                 | 1.28 (1.17-1.39)                | 1.31 (1.20-1.44)                                           |
| ASD (Ref = none)                                                                     | 2.46 (2.26-2.67)                              |                                  | 2.79 (2.55-3.05)                |                                                            |
| Bipolar disorder (Ref = none)                                                        |                                               | 1.87 (1.68-2.08)                 | 1.86 (1.67-2.06)                |                                                            |
| OCD (Ref=none)                                                                       | 1.74 (1.54-1.97)                              | 1.75 (1.55-1.97)                 | 1.77 (1.57-1.99)                | 1.87 (1.64-2.13)                                           |
| Non-organic sleep disorder (Ref = none)                                              | 1.56 (1.33-1.82)                              | 1.48 (1.28-1.71)                 | 1.48 (1.28-1.72)                | 1.57 (1.33-1.86)                                           |
| SUD (Ref = none)                                                                     | 1.58 (1.05-2.38)                              | 1.26 (0.87-1.84)                 | 1.27 (0.87-1.85)                | 1.58 (1.05-2.39)                                           |
| <b>Number of comorbidities and individual psychiatric comorbidities (Ref = none)</b> |                                               |                                  |                                 |                                                            |
| Depression                                                                           | 1.81 (1.68-1.96)                              | 1.82 (1.68-1.96)                 | 1.84 (1.70-1.98)                | 1.81 (1.67-1.95)                                           |
| Anxiety disorder                                                                     | 1.19 (1.06-1.33)                              | 1.19 (1.06-1.33)                 | 2.04 (1.87-2.22)                | 1.18 (1.05-1.32)                                           |
| Tic disorder                                                                         | 2.04 (1.87-2.22)                              | 2.04 (1.87-2.23)                 | 1.19 (1.06-1.33)                | 2.06 (1.89-2.25)                                           |
| Intellectual disability                                                              | 2.27 (2.08-2.49)                              | 2.28 (2.08-2.49)                 |                                 |                                                            |
| Conduct disorder                                                                     | 1.36 (1.20-1.54)                              | 1.36 (1.20-1.54)                 | 3.36 (3.00-3.76)                | 1.37 (1.20-1.55)                                           |
| ASD                                                                                  | 3.38 (3.01-3.78)                              |                                  | 1.59 (1.22-2.07)                |                                                            |
| Bipolar disorder                                                                     |                                               | 2.28 (1.72-3.02)                 | 2.33 (1.76-3.08)                |                                                            |
| OCD                                                                                  | 1.56 (1.20-2.04)                              | 1.57 (1.20-2.04)                 | 1.12 (0.77-1.64)                | 1.56 (1.20-2.03)                                           |
| Non-organic sleep disorder                                                           | 1.12 (0.77-1.64)                              | 1.12 (0.77-1.64)                 | 1.89 (0.71-5.04)                | 1.12 (0.76-1.63)                                           |
| SUD                                                                                  | 1.86 (0.70-4.97)                              | 1.86 (0.70-4.96)                 | 2.95 (2.74-3.18)                | 1.88 (0.70-5.01)                                           |
| Two comorbid disorders                                                               | 2.76 (2.56-2.96)                              | 2.80 (2.60-3.01)                 | 4.25 (3.79-4.75)                | 2.60 (2.40-2.83)                                           |
| Three or more comorbid disorders                                                     | 4.14 (3.69-4.66)                              | 4.07 (3.65-4.54)                 | 1.26 (1.07-1.47)                | 3.80 (3.27-4.41)                                           |

Attention deficit hyperactivity disorder, ADHD; hazard ratios, HRs; confidence intervals, CIs; autism spectrum disorder, ASD; intellectual disability, ID; obsessive-compulsive disorder, OCD; substance use disorder, SUD  
a. The result was estimated using Model 2, adjusting sex, age, health insurance, psychiatric hospitalization, and psychotropic medication use as covariates.

**eFigure 2. Sankey Diagram Illustrating the Incidence of Psychiatric Comorbidities in the Diagnostic Transition From ADHD to Schizophrenia in Patients According to Age Groups <sup>a</sup>**

**(a) age 5–9**

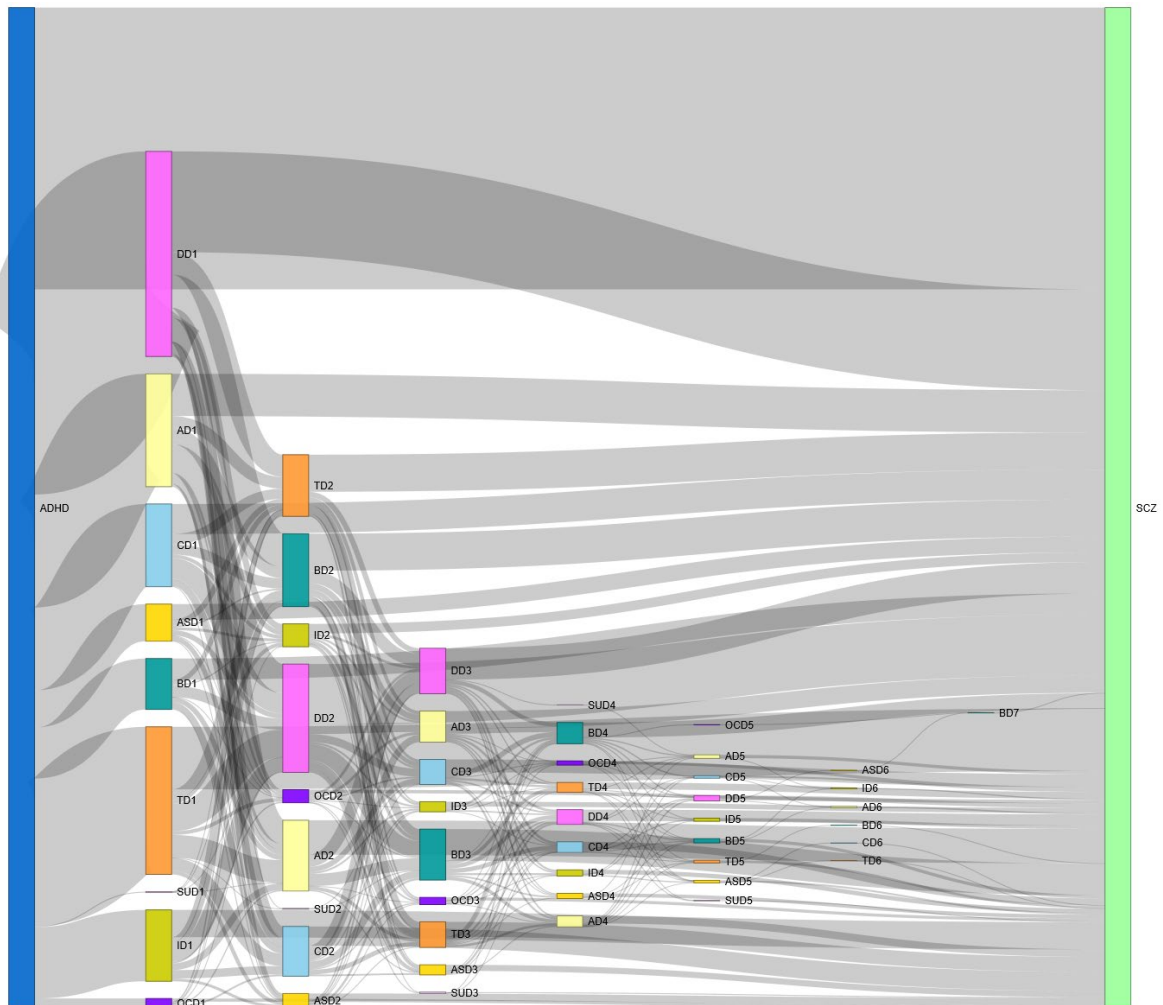

Attention deficit hyperactivity disorder, ADHD; depression disorder, DD; anxiety disorder, AD; conduct disorder, CD; bipolar disorder, BD; autism spectrum disorder, ASD; tic disorder, TD; substance use disorder, SUD, intellectual disability, ID; obsessive compulsive disorder, OCD. The numbers for each disorder indicate the sequence of comorbidities that occurred after the diagnosis of ADHD

a. This analysis is specifically conducted in patients who transitioned to schizophrenia without any psychiatric comorbidity at baseline.

(Continued) eFigure 2.

(b) age 10–14 <sup>a</sup>

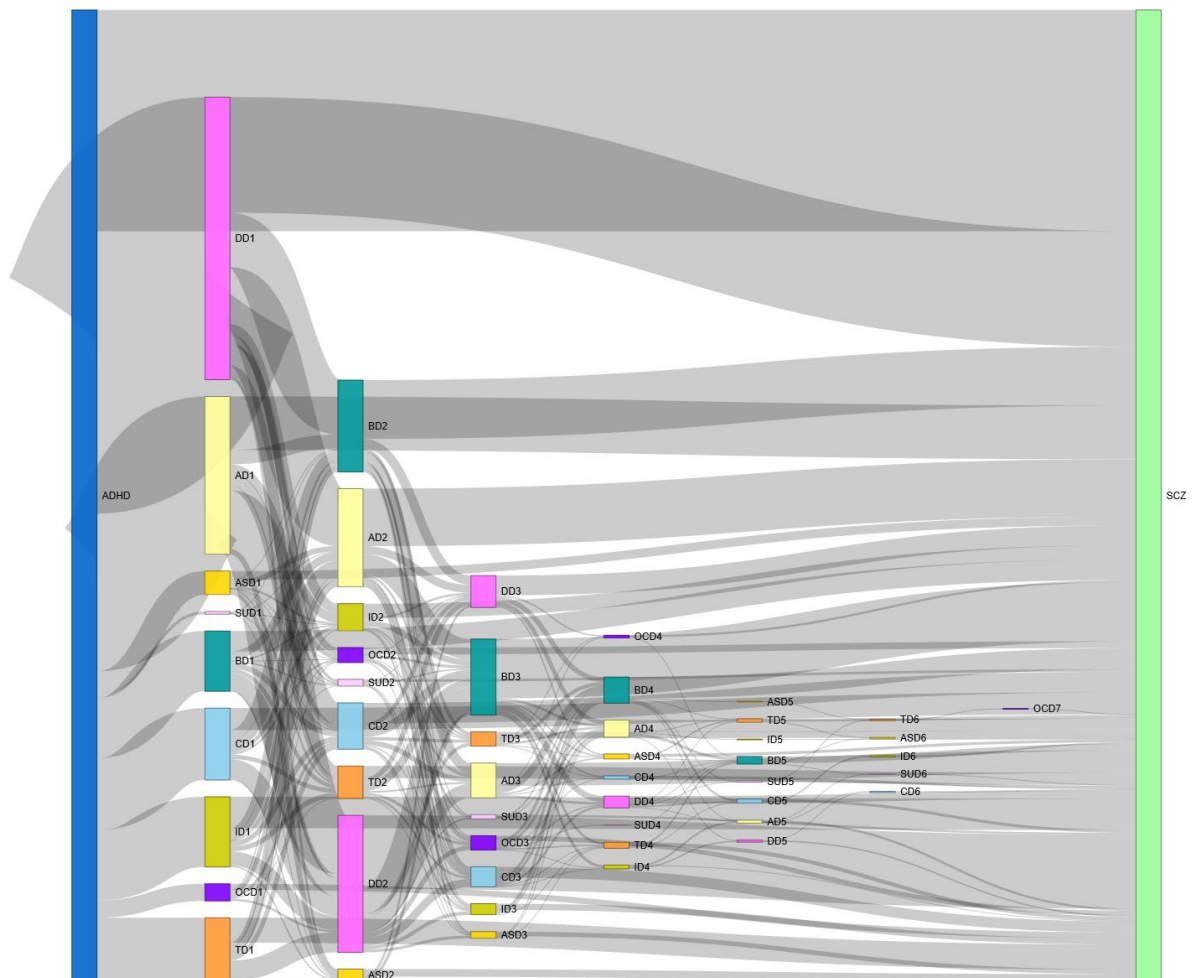

Attention deficit hyperactivity disorder, ADHD; depression disorder, DD; anxiety disorder, AD; conduct disorder, CD; bipolar disorder, BD; autism spectrum disorder, ASD; tic disorder, TD; substance use disorder, SUD, intellectual disability, ID; obsessive compulsive disorder, OCD. The numbers for each disorder indicate the sequence of comorbidities that occurred after the diagnosis of ADHD

a. This analysis is specifically conducted in patients who transitioned to schizophrenia without any psychiatric comorbidity at baseline.



(Continued) eFigure 2.

(c) age 15–19<sup>a</sup>

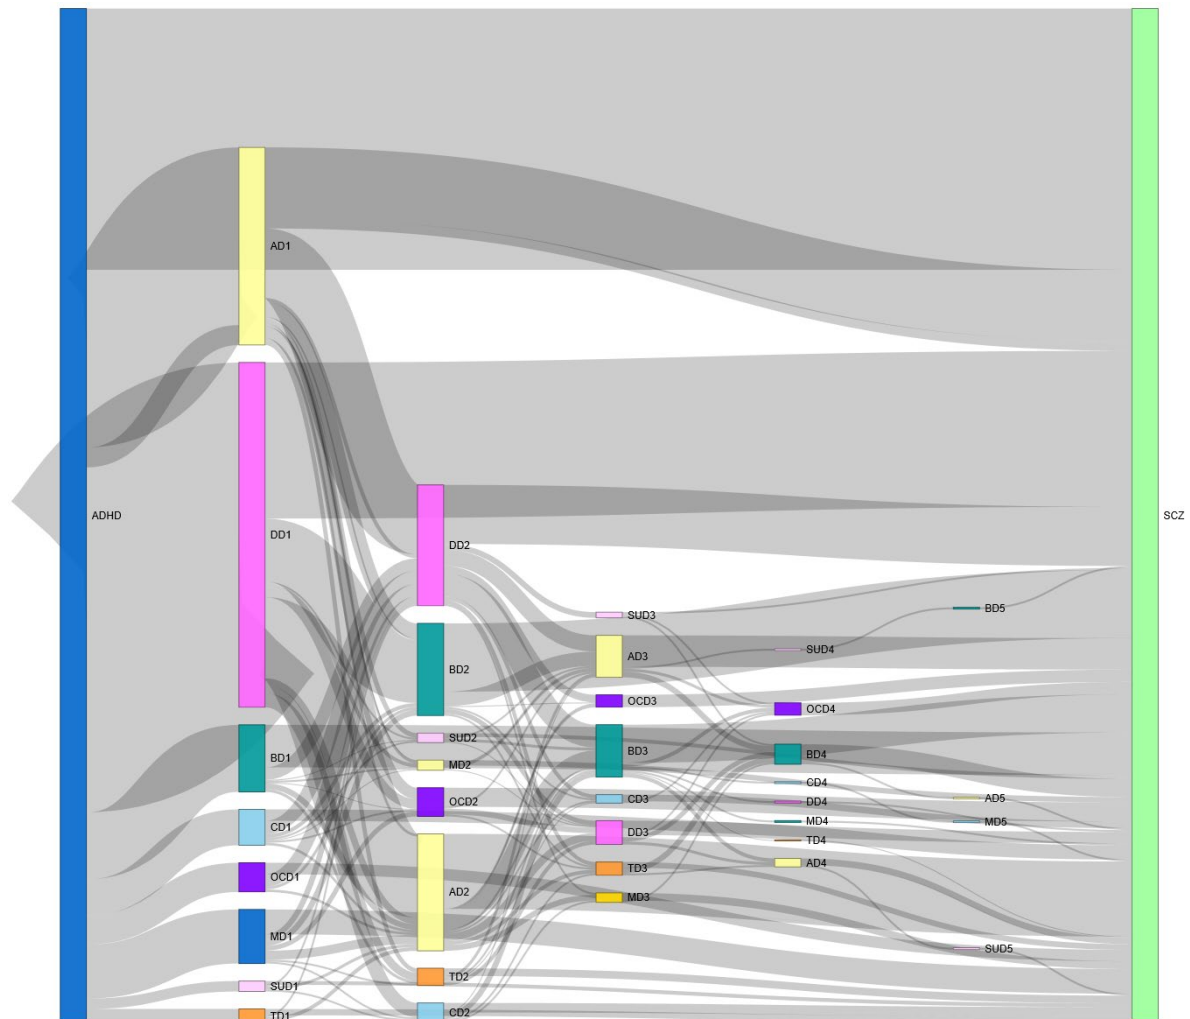

Attention deficit hyperactivity disorder, ADHD; depression disorder, DD; anxiety disorder, AD; conduct disorder, CD; bipolar disorder, BD; autism spectrum disorder, ASD; tic disorder, TD; substance use disorder, SUD, intellectual disability, ID; obsessive compulsive disorder, OCD. The numbers for each disorder indicated the sequence of comorbidities that occurred after the diagnosis of ADHD

a. This analysis is specifically conducted in patients who transitioned to schizophrenia without any psychiatric comorbidity at baseline.
