# Supplementary material for: Psychiatric Comorbidities and Schizophrenia in Youths With Attention-Deficit/Hyperactivity Disorder
Source: PubMed Central journal article supplement (PMC10690465; doi:10.1001/jamanetworkopen.2023.45793), 2023-11-30
Supplement: jamanetwopen-e2345793-s003.pdf [file jamanetwopen-e2345793-s003.pdf]

## Data Sharing Statement

Jeon. Psychiatric Comorbidities and Schizophrenia in Youths With Attention-Deficit/Hyperactivity Disorder. *JAMA Netw Open*. Published November 30, 2023. doi:10.1001/jamanetworkopen.2023.45793

### Data

**Data available:** No

### Additional Information

**Explanation for why data not available:** This study used Health Insurance Review and Assessment Service database (M20230801005). Requests to access these datasets should be directed to HIRA; Official website of HIRA: <https://opendata.hira.or.kr>; Contact information of data access committee: +82-33-739-1083
